# Supplementary material
Source: PubMed Central journal article supplement (PMC3326349)
Supplement: NIHMS368058-supplement-SI_Table_1.pdf [file NIHMS368058-supplement-SI_Table_1.pdf]

**Supplementary Table S1.** List of primers used for sequencing

| Gene                 | Full name | Primer sequence (5'–3')*   |
|----------------------|-----------|----------------------------|
| <b>Nucleoprotein</b> | N127      | F: ATGTAACACCTCTACAATGG    |
|                      | N8 m      | R: CAGTCTCYTCNGCCATCTC     |
|                      | N577 m    | F: AAGATGTGYGCYAAYTGGAG    |
|                      | N829      | R: GCCCTGGTTCGAACATTCT     |
| <b>Glycoprotein</b>  | M220      | F: TGGTGTATTCAACATGRAYTC   |
|                      | G780      | R: ACCCATGTYCCRTCCATAAG    |
|                      | G         | F: GACTTGGGTCTCCCGAACTGGGG |
|                      | L1        | R: GAGTTNAGRRTTGTARTCAGAG  |
|                      | G1319     | F: TACCATATTCAACAAAACCTT   |
|                      | Gh3-2     | F: GATTACACYATYTGGATGCC    |
|                      | Gh4       | R: ACAAATCCTCAGCCTCATC     |
|                      | G5 m      | F: AATNGGRTCRTCATABACCTC   |
|                      | G462      | F: GGAGTCYCTYGTYATATCTCC   |
|                      | G1260     | R: CCAACAAWTCCATATGCTG     |

\*F, Forward; R, reverse.
