# Supplementary material
Source: PubMed Central journal article supplement (PMC3326349)
Supplement: NIHMS368058-supplement-SI_Table_2.pdf [file NIHMS368058-supplement-SI_Table_2.pdf]

**Supplementary Table S2.** Isolates of RABV of canid origin used for phylogenetic analysis (Figs 1 and 2 of the main text)

GenBank accession numbers for newly acquired sequences from non-flying mammals are designated EU086128–EU086218.

| Country      | Isolate    | Year | Species | GenBank accession number |          |
|--------------|------------|------|---------|--------------------------|----------|
|              |            |      |         | N gene                   | G gene   |
| Afghanistan  | 02052AFG   | 2002 | Dog     | EU086212                 |          |
| Afghanistan  | 04027AFG   | 1996 | Dog     | EU086162                 |          |
| Afghanistan  | 04029AFG   | 2004 | Dog     | EU086211                 | EU086128 |
| Algeria      | 9137ALG    | 1982 | Dog     | U22643                   |          |
| Benin        | 8697BEN    | 1986 | Cat     | U22485                   |          |
| Bosnia       | 8653YOU    | 1986 | Wolf    | U42704                   |          |
| Bosnia       | 86111YOU   | 1986 | Red fox | U42706                   |          |
| Brazil       | BRdg10     | 1987 | Dog     | AB083796                 |          |
| Brazil       | BRdg12     | 1989 | Dog     | AB083797                 |          |
| Brazil       | BRdg15     | 1999 | Dog     | AB083798                 |          |
| Burkina Faso | 8636HAV    | 1986 | Dog     | U22486                   |          |
| Cambodia     | 9719CBG    | 1997 | Dog     | EU086215                 |          |
| Cambodia     | 9908CBG    | 1999 | Dog     | EU086167                 | EU086130 |
| Cambodia     | 9911CBG    | 1998 | Dog     | EU086168                 | EU086131 |
| Cambodia     | 9912CBG    | 1998 | Dog     | EU086169                 | EU086132 |
| Cambodia     | 9914CBG    | 1997 | Dog     | EU086170                 |          |
| Cambodia     | 9916CBG    | 1999 | Dog     | EU086171                 | EU086133 |
| Cambodia     | 02006CBG   | 1998 | Dog     | EU086172                 | EU086134 |
| Cameroon     | 8801CAM    | 1987 | Dog     | U22634                   |          |
| Cameroon     | 8805CAM    | 1988 | Unknown | U22636                   | AF325481 |
| Cameroon     | 8804CAM    | 1988 | Cat     | U22635                   |          |
| Canada       | 9105CAN    | 1990 | Red fox | U22655                   |          |
| Canada       | 90RABN5803 | 1990 | Red fox | U11753                   |          |
| Canada       | 90RABN9285 | 1990 | Red fox | U11756                   |          |
| Canada       | 91RABN2756 | 1991 | Skunk   | U11741                   |          |
| Canada       | 91RABN0730 | 1991 | Skunk   | U11748                   |          |
| Canada       | 93RABN0173 | 1993 | Skunk   | U11739                   |          |
| Canada       | 91RABN2901 | 1991 | Skunk   | U11742                   |          |
| Canada       | 91RABN3899 | 1991 | Skunk   | U11743                   |          |
| Canada       | 91RABN6921 | 1991 | Red fox | U11747                   |          |

**Bourhy, H., Reynes, J.-M., Dunham, E. J., Dacheux, L., Larrous, F., Huong, V. T. Q., Xu, G., Yan, J., Miranda, M. E. G. and Holmes, E. C. (2008).** The origin and phylogeography of dog rabies virus. *J Gen Virol*, **89**, 2673-2681.

|                          |            |      |           |          |          |
|--------------------------|------------|------|-----------|----------|----------|
| Canada                   | 90RABN5850 | 1990 | Skunk     | U11754   |          |
| Canada                   | 91RABN0783 | 1991 | Red fox   | U11757   |          |
| Canada                   | 91RABN5537 | 1991 | Red fox   | U11745   |          |
| Canada                   | 93RABN0113 | 1993 | Red fox   | U11737   |          |
| Canada                   | 91RABN5643 | 1991 | Red fox   | U11746   |          |
| Canada                   | 90RABN9196 | 1990 | Red fox   | U11758   |          |
| Canada                   | 90RABN9339 | 1990 | Red fox   | U11751   |          |
| Canada                   | 90RABN9239 | 1990 | Red fox   | U11750   |          |
| Canada                   | 90RABN9341 | 1990 | Skunk     | U11752   |          |
| Canada                   | 91RABN1035 | 1991 | Skunk     | U11736   |          |
| Canada                   | 91RABN5532 | 1991 | Red fox   | U11744   |          |
| Canada                   | 91RABN1578 | 1991 | Skunk     | U11755   |          |
| Canada                   | 92RBG1741  | 1992 | Skunk     | AF344305 |          |
| Canada                   | 92RBG0867  | 1992 | Skunk     | AF344307 |          |
| Central African Republic | 9228CAF    | 1992 | Dog       | U22650   |          |
| Central African Republic | 9229CAF    | 1992 | Dog       | U22651   |          |
| China                    | 9709CHI    | 1986 | Human     | EU086214 |          |
| China                    | 9811CHI    | 1998 | Dog       | EU086173 | EU086135 |
| China                    | 02035CHI   | 1997 | Dog       | EU086174 | EU086136 |
| China                    | 02036CHI   | 1997 | Dog       |          | EU086137 |
| China                    | 02037CHI   | 1997 | Dog       | EU086175 |          |
| China                    | 02039CHI   | 1992 | Dog       |          | EU086138 |
| China                    | 02040CHI   | 1992 | Human     | EU086176 | EU086139 |
| China                    | 02041CHI   | 1987 | Dog       | EU086177 | EU086140 |
| China                    | 02042CHI   | 1969 | Dog       | EU086178 |          |
| China                    | 02043CHI   | 1989 | Dog       | EU086179 | EU086141 |
| China                    | 02044CHI   | 1989 | Dog       | EU086180 | EU086142 |
| China                    | 02045CHI   | 1989 | Dog       | EU086181 | EU086143 |
| China                    | 02046CHI   | 1994 | Dog       | EU086182 | EU086144 |
| China                    | 02047CHI   | 1994 | Dog       | EU086183 |          |
| China                    | 02049CHI   | 1993 | Sika deer | EU086184 |          |
| China                    | 02050CHI   | 1992 | Human     | EU086185 | EU086145 |
| China                    | 05005CHI   | 2005 | Dog       | EU086186 | EU086146 |
| China                    | 05006CHI   | 2004 | Dog       | EU086187 | EU086147 |
| China                    | 05007CHI   | 2004 | Dog       | EU086188 | EU086148 |
| China                    | 05008CHI   | 2004 | Dog       | EU086189 | EU086149 |

**Bourhy, H., Reynes, J.-M., Dunham, E. J., Dacheux, L., Larrous, F., Huong, V. T. Q., Xu, G., Yan, J., Miranda, M. E. G. and Holmes, E. C. (2008).** The origin and phylogeography of dog rabies virus. *J Gen Virol*, **89**, 2673-2681.

|                                |                |      |                             |          |           |
|--------------------------------|----------------|------|-----------------------------|----------|-----------|
| China                          | 05009CHI       | 2005 | Dog                         | EU086190 | EU086150  |
| Colombia                       | C01/04 (41448) | 2004 | Dog                         | EU086161 |           |
| Democratic Republic of Congo   | 8915ZAI        | 1989 | Dog                         | U22638   |           |
| Egypt                          | 8692EGY        | 1979 | Human                       | U22627   |           |
| Estonia                        | 9142EST        | 1985 | Raccoon dog                 | U22476   |           |
| Estonia                        | 9342EST        | 1991 | Raccoon dog                 | U43432   |           |
| Ethiopia                       | 8807ETH        | 1987 | Hyena                       | U22637   |           |
| Federal Republic of Yugoslavia | 86106YOU       | 1972 | Red fox                     | U22839   |           |
| Federal Republic of Yugoslavia | 86107YOU       | 1976 | Red fox                     | U42703   |           |
| Federal Republic of Yugoslavia | 8658YOU        | 1981 | Cattle                      | U42705   | AF134344  |
| France                         | 8903FRA        | 1989 | Red fox                     | U42606   |           |
| France                         | 9147FRA        | 1991 | Red fox                     | U22474   | AF047516* |
| France                         | 9616FRA        | 1996 | Sheep                       | AF033905 |           |
| France                         | 8663FRA        | 1984 | <i>Eliomys quercinus</i>    | AF134325 |           |
| Gabon                          | 8698GAB        | 1986 | Dog                         | U22630   | AF325470  |
| Gabon                          | 8693GAB        | 1986 | Dog                         | U22629   |           |
| Germany                        | 9202ALL        | 1991 | Red fox                     | U42701   |           |
| Germany                        | 9212ALL        | 1991 | Red fox                     | U22475   |           |
| Germany                        | 9213ALL        | 1991 | Red fox                     | U42702   |           |
| Greenland                      | 8684GRO        | 1981 | Arctic fox                  | U22654   |           |
| Guinea                         | 8660GUI        | 1986 | Dog                         | U22487   | AF325484  |
| Guinea                         | 9024GUI        | 1990 | Dog                         | U22641   |           |
| Hungary                        | 9215HON        | 1991 | Human                       | U43025   | AF325462  |
| Hungary                        | 9383HON        | 1993 | Red fox                     | U42998   |           |
| India                          | 9702INDI       | 1997 | Human                       | EU086191 |           |
| India                          | AF374721       |      | Dog                         | AF374721 |           |
| India                          | AY956319       | 2004 | Human                       | AY956319 | AY956319  |
| India                          | NNV-RAB-H      | 2006 | Human                       |          | EF437215  |
| Indonesia                      | 03003INDO      | 2003 | Dog                         | EU086192 | EU086151  |
| Iran                           | 8681IRA        | 1986 | Dog                         | U22482   |           |
| Iran                           | 8702IRA        | 1987 | Wolf ( <i>Canis lupus</i> ) | U22483   |           |
| Ivory Coast                    | 9003CI         | 1989 | Dog                         | U22639   |           |
| Ivory Coast                    | 9026CI         | 1990 | Dog                         | U22646   |           |
| Ivory Coast                    | 9239CI         | 1992 | Dog                         | U22652   |           |
| Kazakhstan                     | 409f           | 1988 | Red fox                     | AY352489 |           |

**Bourhy, H., Reynes, J.-M., Dunham, E. J., Dacheux, L., Larrous, F., Huong, V. T. Q., Xu, G., Yan, J., Miranda, M. E. G. and Holmes, E. C. (2008).** The origin and phylogeography of dog rabies virus. *J Gen Virol*, **89**, 2673-2681.

|             |          |      |             |          |          |
|-------------|----------|------|-------------|----------|----------|
| Kazakhstan  | 408s     | 1988 | Sheep       | AY352490 |          |
| Korea       | KRH3-04  | 2004 | Dog         | AY730596 |          |
| Korea       | KRC5-04  | 2004 | Dog         | AY730597 |          |
| Laos        | 9910LAO  | 1999 | Dog         | EU086193 | EU086152 |
| Laos        | 02001LAO | 2002 | Dog         | EU086194 |          |
| Laos        | 02002LAO | 2002 | Dog         | EU086195 |          |
| Laos        | 02005LAO | 2002 | Dog         | EU086213 |          |
| Malaysia    | 8677MAL  | 1985 | Human       | U22916   | AF325487 |
| Mauritania  | 8689MAU  | 1986 | Camel       | U22489   | AF325483 |
| Mexico      | 9126MEX  | 1991 | Dog         | U22477   | AF325477 |
| Mexico      | 9110MEX  | 1991 | Human       | U22841   |          |
| Morocco     | 87012MAR | 1986 | Dog         | U22631   | AF325467 |
| Morocco     | 9107MAR  | 1990 | Human       | U22852   | AF401287 |
| Morocco     | 9106MAR  | 1990 | Human       | U22642   | AF325469 |
| Mozambique  | 8631MOZ  | 1986 | Dog         | U22484   |          |
| Myanmar     | 9909BIR  | 1999 | Dog         | EU086164 |          |
| Myanmar     | 9913BIR  | 1999 | Dog         | EU086165 | EU086129 |
| Myanmar     | 9915BIR  | 1999 | Dog         | EU086166 |          |
| Namibia     | 8708NAM  | 1987 | Kudu        | U22632   |          |
| Namibia     | 9227NAM  | 1992 | Jackal      | U22649   |          |
| Nepal       | 94260NEP | 1989 | Dog         | U22918   |          |
| Nepal       | 9901NEP  | 1998 | Dog         | EU086196 | EU086153 |
| Nepal       | 9902NEP  | 1998 | Goat        | EU086197 | EU086154 |
| Nepal       | 9903NEP  | 1998 | Mongoose    | EU086198 |          |
| Niger       | 9012NIG  | 1990 | Dog         | U22640   |          |
| Nigeria     | 8670NGA  | 1983 | Human       | U22488   | AF325479 |
| Oman        | 9135OMA  | 1990 | Fox         | EU086199 |          |
| Pakistan    | 196p     | 1990 | Cow         | AY352495 |          |
| Pakistan    | Rv193    | 1989 | Dog         | AY102996 |          |
| Pakistan    | 277p     | 1990 | Goat        | AY352496 |          |
| Philippines | 94273PHI | 1994 | Dog         | EU086201 |          |
| Philippines | 94280PHI | 1994 | Dog         | EU086202 |          |
| Philippines | 94270PHI | 1994 | Dog         | EU086200 |          |
| Philippines | 03006PHI | 2000 | Human       | EU086203 |          |
| Philippines | 03007PHI | 2001 | Human       | EU086204 |          |
| Philippines | 04030PHI | 2004 | Human       | EU086205 | EU086155 |
| Poland      | 8618POL  | 1985 | Raccoon dog | U22840   | AF325464 |

**Bourhy, H., Reynes, J.-M., Dunham, E. J., Dacheux, L., Larrous, F., Huong, V. T. Q., Xu, G., Yan, J., Miranda, M. E. G. and Holmes, E. C. (2008).** The origin and phylogeography of dog rabies virus. *J Gen Virol*, **89**, 2673-2681.

|              |          |           |                                     |          |          |
|--------------|----------|-----------|-------------------------------------|----------|----------|
| Russia       | 9141RUS  | 1988      | Arctic fox                          | U22656   |          |
| Russia       | 857r     | 1980      | Raccoon dog                         | AY352458 |          |
| Russia       | 304c     | 1977      | Steppe fox ( <i>Vulpes corsac</i> ) | AY352502 |          |
| Russia       | 248c     | 1977-1980 | Steppe fox ( <i>Vulpes corsac</i> ) | AY352460 |          |
| Russia       | RVHK     | 1998      | Human                               | AY352462 |          |
| Russia       | 3561d    | 1996      | Dog                                 | AY352481 |          |
| Russia       | 686cow   | 1987      | Cow                                 | AY352482 |          |
| Russia       | 765w     | 1989      | Wolf ( <i>Canis lupus</i> )         | AY352483 |          |
| Russia       | 3510w    | 1995      | Wolf ( <i>Canis lupus</i> )         | AY352486 |          |
| Russia       | 483a     | 1986      | Arctic fox                          | AY352487 |          |
| Russia       | 743a     | 1988      | Arctic fox                          | AY352488 |          |
| Saudi Arabia | 8706ARS  | 1987      | Fox                                 | EU086163 |          |
| South Africa | 8721AFS  | 1981      | Human                               | U22633   |          |
| South Africa | 15000AFS | 1987      | Yellow mongoose                     | U22628   |          |
| Sri Lanka    | 94257SRI | 1986      | Dog                                 |          | AF325489 |
| Sri Lanka    | SRL1143  | 1995–1996 | Cat                                 | AB041968 |          |
| Sri Lanka    | SRL1036  | 1995–1996 | Dog                                 | AB041965 |          |
| Sri Lanka    | 5657     | 2001      | Cow                                 | AY138550 |          |
| Sri Lanka    | 1294     | 1986      | Dog                                 | AY138549 |          |
| Tanzania     | 9221TAN  | 1992      | Dog                                 | U22645   |          |
| Tanzania     | 9224TAN  | 1992      | Wild dog                            | U22648   |          |
| Tchad        | 9218TCH  | 1992      | Dog                                 | U22644   |          |
| Thailand     | 8664THA  | 1986      | Dog                                 | EU086216 |          |
| Thailand     | 8738THA  | 1983      | Human                               | EU086208 | AF325488 |
| Thailand     | 8734THA  | 1983      | Human                               | EU086206 | EU086157 |
| Thailand     | 8743THA  | 1983      | Human                               | EU086207 | EU086158 |
| Thailand     | 8758THA  | 1983      | Human                               | EU086217 |          |
| Thailand     | 8760THA  | 1983      | Human                               | EU086218 |          |
| Vietnam      | 01016VNM | 2001      | Dog                                 | EU086209 | EU086159 |
| Vietnam      | 01017VNM | 2001      | Dog                                 | EU086210 | EU086160 |

**Bourhy, H., Reynes, J.-M., Dunham, E. J., Dacheux, L., Larrous, F., Huong, V. T. Q., Xu, G., Yan, J., Miranda, M. E. G. and Holmes, E. C. (2008).** The origin and phylogeography of dog rabies virus. *J Gen Virol*, **89**, 2673-2681.
